# Supplementary material for: Fibrinogen Alpha Chain Knockout Promotes Tumor Growth and Metastasis through Integrin–AKT Signaling Pathway in Lung Cancer
Source: Oxford University Press journal article supplement (doi:10.1158/1541-7786.mcr-19-1033), 2020-03-23
Supplement: 15417786mcr191033-sup-230971_2_supp_6136927_q6mmdx.xlsx [file 15417786mcr191033-sup-230971_2_supp_6136927_q6mmdx.xlsx]

## Sheet: Sheet1
Supplementary Table S2 sgRNAs and primer sequences used in this study
Primer Name	Sequence
has-FGA-Cas9-F	CACCCAGTCTTCATCAGAGCAGAA
has-FGA-Cas9-R	AAACTTCTGCTCTGATGAAGACTG
has-FGA-seq-F	TGTGAGAGTGCCATCTCTTCC
has-FGA-seq-R	TTCTGGGACCAATCAGGTCA
