# Supplementary material for: Fibrinogen Alpha Chain Knockout Promotes Tumor Growth and Metastasis through Integrin–AKT Signaling Pathway in Lung Cancer
Source: Oxford University Press journal article supplement (doi:10.1158/1541-7786.mcr-19-1033), 2020-03-23
Supplement: 15417786mcr191033-sup-230971_2_supp_6136928_q655dx.xlsx [file 15417786mcr191033-sup-230971_2_supp_6136928_q655dx.xlsx]

## Sheet: Sheet1
Supplementary Table S3. The clinicopathological characteristics and expression of FGA and p-AKTS473of the lung cancer specimens
		FGA			p-AKTS473
Categories	Total	Positive n(%)	Negative n(%)	p value a	Positive n(%)	Negative n(%)	p value a
Age at the time of diagnosis (mean ± SD)	59.16 ± 9.49
Year of diagnosis	2012-2018
Gender
Female	16	6 (33.3)	10 (31.3)	0.88	10 (30.3)	6 (35.3)	0.72
Male	34	12 (66.7)	22 (68.7)		23 (69.7)	11 (64.7)
Smoking
Yes	29	8 (44.4)	21 (65.6)	0.145	19 (57.6)	10 (58.8)	0.933
No	21	10 (55.6)	11 (34.3)		14 (42.4)	7 (41.2)
Histologic type b
LUAD	22	9 (50.0)	13 (40.6)	0.866	13 (39.4)	9 (52.9)	0.501
LUSC	19	6 (33.3)	13 (40.6)		15 (45.5)	4 (23.5)
LASC	2	1 (5.6)	1 (3.1)		1 (3.0)	1 (5.9)
SCLC	7	2 (11.1)	5 (15.6)		4 (12.1)	3 (17.6)
Tumor stage (AJCC) c
I	19	6 (33.3)	13 (40.6)	0.584	11 (33.3)	8 (47.1)	0.637
II	21	7 (38.9)	14 (43.8)		15 (45.5)	6 (35.3)
III	10	5 (27.8)	5 (15.6)		7 (21.2)	3 (17.6)
Tumor grade
Well	17	6 (33.3)	11 (34.4)	0.093	12 (36.4)	5 (29.4)	0.815
Middle	26	7 (38.9)	19 (59.4)		17 (51.5)	9 (52.9)
Poor	7	5 (27.8)	2 (6.3)		4 (12.1)	3 (17.6)
a Pearson Chi-Square Test
b LUAD, lung adenocarcinoma; LUSC,lung squamous cell carcinoma;
LASC, lung adenosquamous carcinoma ; SCLC, small cell lung cancer.
c AJCC Staging System: American Joint Committee on Cancer Staging System
